# Supplementary material
Source: PubMed Central journal article supplement (PMC7307956)
Supplement: nl9b04217_si_001.pdf [file nl9b04217_si_001.pdf]

# **Supporting Information: Dynamic Actuation of DNA-Assembled Plasmonic Nanostructures in Microfluidic Cell-Sized Compartments**

Kerstin Göpfrich,<sup>\*</sup> Maximilian J. Urban, Christoph Frey, Ilia Platzman, Joachim  
P. Spatz,<sup>\*</sup> and Na Liu<sup>\*</sup>

E-mail: kerstin.goepfrich@mr.mpg.de; spatz@mr.mpg.de; na.liu@kip.uni-heidelberg.de

## Figure S1: Layout of the microfluidic droplet production device

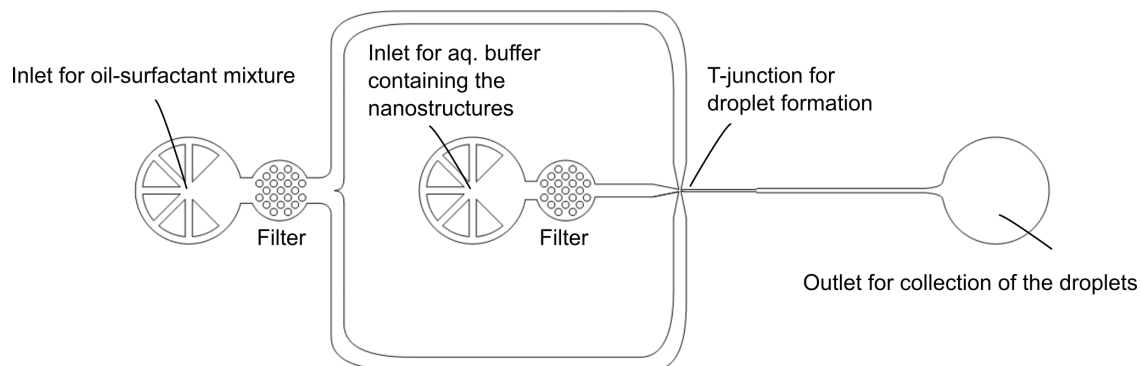

Supplementary Figure 1: Layout of the microfluidic droplet production device for the encapsulation of DNA-assembled plasmonic nanostructures. All fluids are injected via the inlet channels. Droplets are produced at the T-junction, where the flow of the aqueous buffer (containing the nanostructures) is intercepted by an oil-flow. Droplets are collected from the outlet for subsequent experiments.

## Figure S2: Homogeneity of the encapsulation of DNA nanostructures

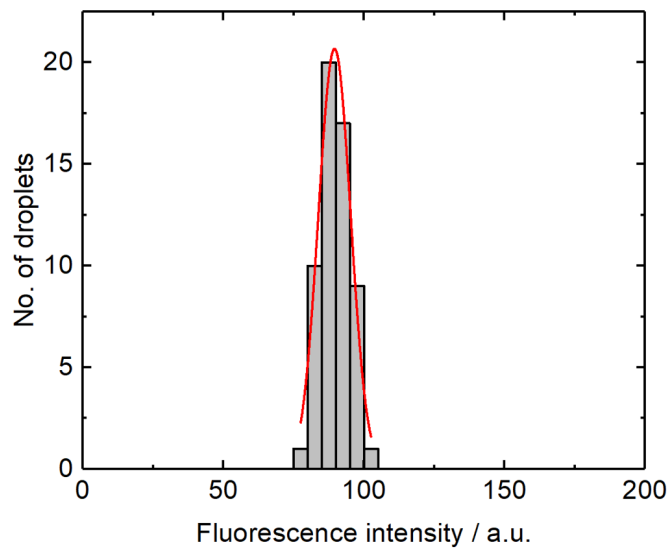

Supplementary Figure 2: Distribution of the fluorescence intensity of microfluidic droplets encapsulating the DNA-assembled plasmonic nanostructures. The narrow distribution confirms the uniform encapsulation of the nanostructures during the droplet formation process.

**Figure S3: Layout of the microfluidic device for plasmonic enantiomer separation**

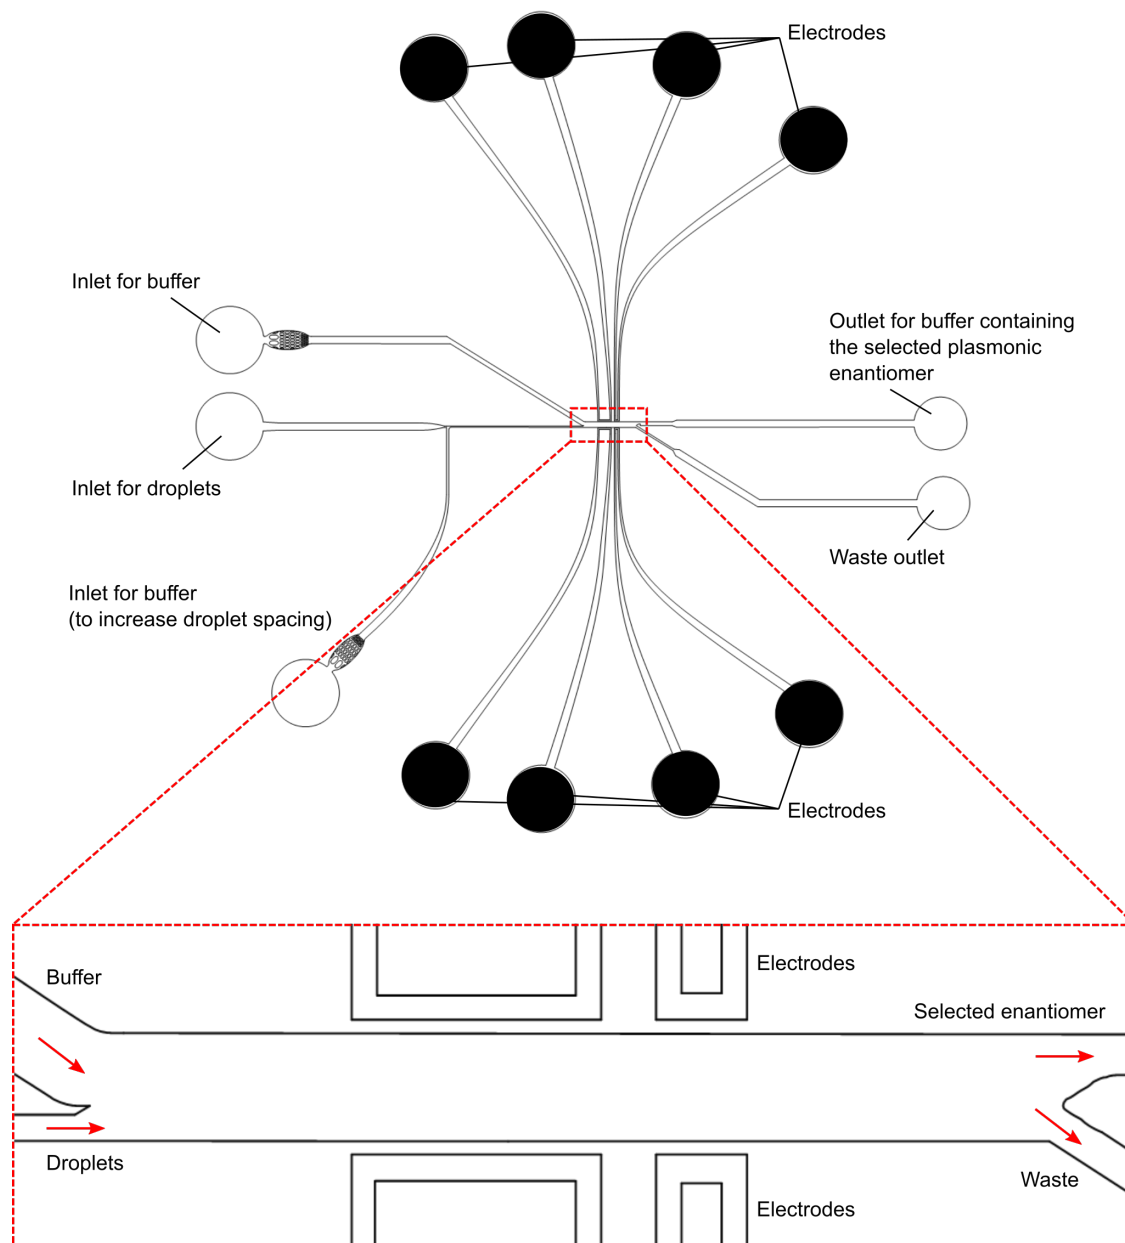

Supplementary Figure 3: Layout of the microfluidic device for the separation of plasmonic enantiomers. Droplets containing a racemic mixture are supplied via the droplet inlet. When exposed to an electric field (see zoom), the droplets fuse to the co-flowing buffer phase, releasing their content, which can then be collected from the outlet. Note that only the electrode facing the aqueous side (top electrode) was turned on for the release (500 V, 0.5 kHz).

## Figure S4: Attachment efficiency of cholesterol-tagged DNA to the droplet periphery

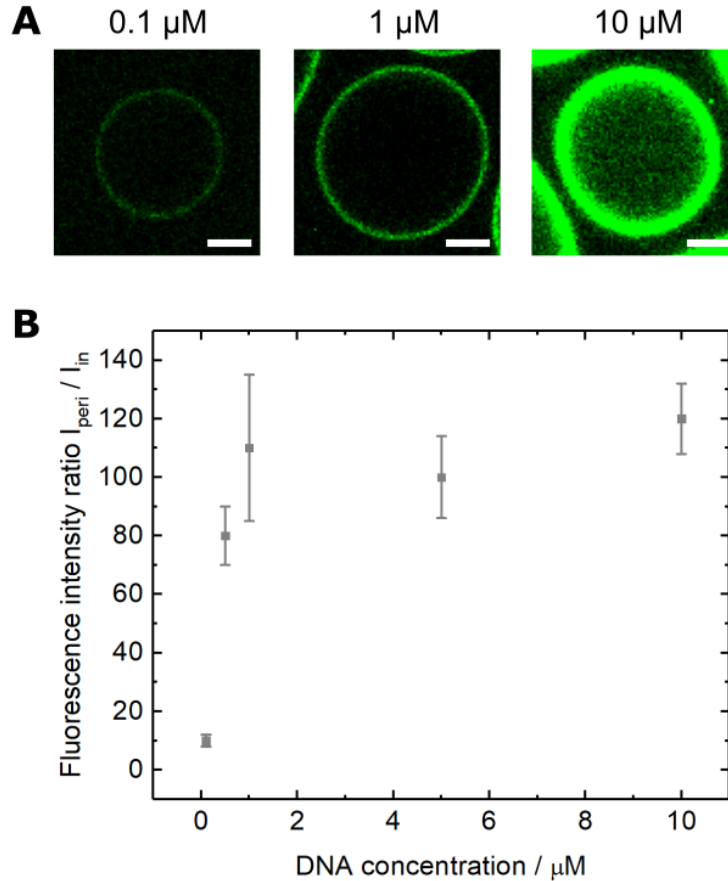

Supplementary Figure 4: A) Confocal fluorescence images showing the attachment of cholesterol-tagged DNA at different DNA concentrations. The images are taken with the same imaging settings. Scale bars: 20  $\mu\text{m}$ . B) Fluorescence intensity ratio as a function of DNA concentration, error bars correspond to the standard deviation ( $n > 10$ ). The relative fluorescence intensities at the droplet periphery ( $I_{\text{peri}}$ ) compared to the droplet lumen ( $I_{\text{in}}$ ) for a broad range of different DNA concentrations (100 nm, 500 nm, 1  $\mu\text{m}$ , 5  $\mu\text{m}$ , 10  $\mu\text{m}$ ) serves a direct measure of the attachment efficiency. We can conclude that there is no strong correlation between the attachment efficiency of the cholesterol-tagged DNA and the DNA concentration. The seemingly lower attachment efficiency at low concentrations of cholesterol-tagged DNA is likely due to the weak signal-to-noise ratio as can be appreciated from the confocal fluorescence images.

## Text S1: Density of cholesterol-tagged DNA on the droplet periphery

As visible in Figure S4, the cholesterol-tagged DNA accumulates at the droplet periphery even at high concentrations ( $10 \mu\text{m}$ ). Let's consider the density of the surface coverage assuming a droplet with a radius of  $r = 20 \mu\text{m}$ . This droplet has a volume  $V$  of

$$V = 4/3\pi \cdot r^3 \approx 33 \text{ pL}; \quad (1)$$

and a surface area  $A$  of

$$A = 4\pi \cdot r^2 \approx 5 \cdot 10^9 \text{ nm}^2. \quad (2)$$

At the maximum DNA concentration of  $c = 10 \mu\text{m}$ , it would encapsulate

$$N = N_A \cdot c \cdot V = 2 \cdot 10^8 \quad (3)$$

DNA strands. Hence, an area of  $25 \text{ nm}^2$  is available per DNA strand. This is significantly more space than the hydrodynamic radius of the short DNA oligomer itself (about  $3 \text{ nm}$ ). This explains why the concentration of the DNA handles has no effect on the filtration efficiency, as long as they are supplied in excess compared to the plasmonic DNA nanostructures. The experimentally achievable concentration of the plasmonic DNA nanostructures is limited to about  $10 \text{ nM}$ . Diluting it for the experiments does not make much sense since it would decrease the signal-to-noise ratio for fluorescence detection as well as CD spectroscopy. Therefore, we chose to work with the maximum concentration of plasmonic DNA nanostructures and a 100x excess of the cholesterol-tagged DNA handles to ensure efficient binding. Additionally we have designed highly polyvalent attachment sites between the DNA origami and the cholesterol anchors (7 handles per origami) to ensure stable binding.

## Table S1: Thermal annealing protocol

Supplementary Table 1: Thermal annealing protocol for the assembly of the cross-shaped DNA nanostructures.<sup>1</sup>

| Temperature, °C | Time, min |
|-----------------|-----------|
| 80              | 15        |
| 79 - 71         | 1         |
| 70 - 68         | 5         |
| 67 - 63         | 10        |
| 62              | 15        |
| 61              | 20        |
| 60              | 30        |
| 59 - 38         | 60        |
| 37 - 36         | 45        |
| 35              | 30        |
| 34              | 20        |
| 33 - 32         | 10        |
| 31 - 25         | 5         |
| 24 - 21         | 2         |
| 20              | Hold      |

Supplementary Table 2: List of DNA 'core' sequences and their start and end points in caDNAo.<sup>2</sup> Adapted from Kuzyk *et al.*<sup>1</sup>

| DNA Sequence                                           | Start   | End     |
|--------------------------------------------------------|---------|---------|
| AACGAGCGTCTTTTCGCCATATTTGTTTAGAAGCGCATTAGAC            | 4[202]  | 7[202]  |
| AGGTTTAACGTCGACACCGCCTGGAAGGGTTAGAAGATTTTC             | 22[62]  | 22[63]  |
| TACTTTTTCTAATCTATTTACAGAAAGGTGCCTGAAACAGTGA<br>GGCCAC  | 15[196] | 25[202] |
| AAGAAGTCCAAAATTAGAGAGCTTAATT                           | 4[118]  | 13[118] |
| TTTGAGATGTTTTTATAATCGCATTCGC                           | 19[196] | 23[195] |
| AATTTTAATTTTCAGCAAGGCAAAGAAT                           | 26[146] | 16[133] |
| TCGACAAATTATCAGTCAATATAGGTCTGAGAGACGTGAATT<br>ACGAATA  | 25[119] | 14[112] |
| ACTCGTCAATCGGAGAGTAACCTCGTATGAGCACTGGAAGGT<br>AACCTCA  | 14[132] | 22[126] |
| CTCATAATGTTTAGACACCCCCAGCGATAAGAGGA                    | 5[84]   | 9[90]   |
| CATAACCTTATTACCCTCAGAACCGCCCCAGGTCATTTTTG              | 2[97]   | 13[97]  |
| CCGGCTTAGACGCTCGGCTGACGCATTTCCCAAATGAGCGG<br>ATGGAGGA  | 16[97]  | 25[90]  |
| TGTCCATCACGCAAATTAACCTTTTAGACAATAGGAACCCGTC<br>GGCAAAT | 25[217] | 22[224] |
| AATTAATTTTCCCTCTCCTGGTTGGTGTGTGGACT                    | 15[42]  | 27[48]  |
| AGGGAGCGCCATCTAAAGCCTCAGAGCA                           | 27[140] | 15[153] |
| GTCAATACTAACTTTTTCAAATTAACACGCAAATGAAAAATC             | 24[104] | 21[118] |
| TATTCTGAAATAAAGGTGGAATAAATTGAGGTTAAAGGT<br>AGCAAG      | 0[261]  | 9[258]  |
| TATACTTAGATACATTTTCATCACAGAGGTCACCTTGCAGACA            | 18[139] | 21[139] |
| GGCAATTTTCTGAATAATGGCAGTTACAAAATTAATTACAT              | 25[63]  | 18[49]  |
| GAGATTTACCTAAAACGAAAGGCCACTAAATCATTTTGGA<br>AGAATTCC   | 10[55]  | 2[49]   |
| CCAAAGAAGAAAATACAAACAACCTGGTAATAAGTTCAGTGC<br>CTCAAGAG | 11[224] | 0[217]  |
| GTGGTTGTGGGAAGGGAAACCAGGCAAA                           | 15[252] | 17[265] |
| CATACAGTTTGGGGAGTATCATAATGGTGAACCACTGAATGG             | 16[153] | 21[153] |
| AACCGCCGAGGCAGGTCAGACGATTGACCACGCCACCCTCAG             | 5[224]  | 5[223]  |



Supplementary Table 3: List of DNA 'core' sequences (continued).

| DNA Sequence                                            | Start   | End     |
|---------------------------------------------------------|---------|---------|
| GTTTGATGGTGGTTCCGTAGCCCGTGTTATCCTGTA<br>AATCTCCCCGGGT   | 25[25]  | 16[24]  |
| AACGGCTAGGGATAAACTACAACGCCT                             | 13[35]  | 1[48]   |
| GGAGGTTACCCTCAACCACCGTAGCGCGTTTTTCATA<br>TCGATAAGCACCA  | 4[237]  | 9[244]  |
| CGAGTAAGTAATAAAGGGTGATATTTTAAATGCAA                     | 25[203] | 16[196] |
| AGAATCCAAATCAGTTGTAAACGTTAATCCCCAAAA<br>ACTAGCATGTCAA   | 24[216] | 20[196] |
| ACCATCACACATAAGATAGCTTAGATTAAGGTTGG                     | 27[77]  | 16[84]  |
| GAGGTTTTTTTTAGCGCGGGGTTTTGCTCAGAACTG                    | 2[202]  | 13[195] |
| AATATCAAACCCTCTTGAAAGGAATTGAAACAACCTT<br>AGTTAATTTTCGCA | 22[125] | 18[119] |
| GAAACACCAGAACGAGTAGTAGTGAGAA                            | 4[62]   | 5[48]   |
| AGCTAAACAGGAGGAATTCGCATTAAAT                            | 24[265] | 22[252] |
| AATTGCTGACGACGATAAAAATTTGCCAAGCGTCCACAGTTC              | 12[104] | 6[105]  |
| CTTGATATTCAACCTGAGAGTCTGGACCAAGGGATTTGACGA              | 18[244] | 25[244] |
| AAAGAAATTACATCGGGAGACGCTGAGACATAAACAGAAAT               | 22[83]  | 22[84]  |
| AAGATTAGTATTCTGGCGGATAAGTGCCACTAATAACGGAAT              | 2[181]  | 13[181] |
| TTTGCCCGAACGCCCTGAAATGGATTTACTAAATTTATGCGT              | 25[140] | 18[140] |
| AAGGATTCCTTATTGTCAGATAGCCGAACTGAATCCTTGCGG              | 0[216]  | 2[203]  |
| CCTCATTTTTGTCCACAGAAAATACATACACATGAAAAACAGTT            | 3[238]  | 1[251]  |
| GCATAGTATCAGTTTCAGGAGGTTTAGTCTTAGAGTACCTTT              | 2[118]  | 12[105] |
| ATTTAAACTCATTTTTTAACCAGGAACGCATTGCCGTTCTAG              | 22[223] | 18[224] |
| CGTAATCAGTAGCGAGAGCCAGCAAAATTTGAGCCA<br>TTTGGGACCAGCG   | 8[230]  | 11[223] |
| ATTAACGAGGCGCAAACGGTGATCAAGA                            | 8[90]   | 6[77]   |
| GAGGCTGCAAACGTAATCAATCAAAGGCACCGACC<br>ACCAGTGCAGCAC    | 0[237]  | 8[231]  |
| AAACAGGACGTCAAAAATGAATTACAAATAGCCATAT<br>TTAACCGGAGCG   | 7[182]  | 9[174]  |
| AATACGTGGCACTGTATCTAAAAATTTACATTGGCGCGTAAG              | 22[146] | 22[147] |

Supplementary Table 4: List of DNA 'core' sequences (continued).

| DNA Sequence                                          | Start   | End     |
|-------------------------------------------------------|---------|---------|
| TTAACGATTGCCTTGATATTCTCATATGACGCAGT                   | 2[216]  | 13[223] |
| TTCGAGGAATTGTAAGGAATTGCGAATAACAGTTTAC<br>CATCGGCTTGCA | 8[41]   | 11[34]  |
| AAGACGGAGGAGTAAACAGGGCTTAAGCTA                        | 15[22]  | 14[18]  |
| GAGGAAACGCAAGGTAATTGAGAATCGCTATCTTAGGAAACC            | 12[181] | 12[182] |
| ACAGACATTAATTTCAACTTTCGAAGGCCTTTGAG                   | 2[48]   | 13[55]  |
| ATGTTAGAGACTCCTTGAGTAACAGTGCGGAGTGTAATAAAT            | 13[224] | 3[237]  |
| CAATATCCTATGGTGTGTAGCGGTCACGGTGCTGACCTCTAA            | 17[238] | 15[251] |
| AATAAATTCGAGCTCAGGTCAGGACGAGTAGATTTAGCCAGT            | 10[125] | 10[126] |
| CGGAGACTACTTCTCGGGCGCTAGGGCGGACAATGA<br>CGCAAGATGTG   | 17[217] | 36[226] |
| TATTACCGCCTTGCTGAAAAGAACATCC                          | 25[161] | 16[161] |
| TTTGGGGCTTGAATGAGAAGAGTCAATATACCTTTTAACT              | 27[98]  | 16[98]  |
| CATTTATATTATTTGCACGGTTGGCAA                           | 24[90]  | 23[104] |
| ACTAATCGGTTTATTGACCAACTTTGAACCGGATAAGGAACA            | 6[46]   | 6[47]   |
| TGATTGCAGTAACAGTACCTTTTGCGTACCTACCA                   | 20[69]  | 23[76]  |
| GCACGTAGCGCGTATGGTGCCGGCGATCGGTGCGGGC<br>CTCTATCACCAT | 25[245] | 17[237] |
| ACCAGAACCGAAGCCAATGAAATAACCCACCCTGAACAAAGT            | 12[195] | 8[182]  |
| GGGAACAAGTAACAACGCCATCAAAAATCCGATTAAG<br>TTTGAGGCACCG | 21[238] | 18[245] |
| ACCCAAAAGTACCAAAGAACGCGAGGCGTGAAGCCGCTACAA            | 13[182] | 3[195]  |
| TTATCAATCCCATCCTCATTGAATCCCCAGGTCTTTACCTGT            | 7[140]  | 7[139]  |
| AGTAATAAAAGGGACTCATGGGCGTTAAATAAGTT                   | 23[175] | 19[195] |
| TTAACCTGCCTAATGAGTGCACCTGAGACAAAATCCCATGAT            | 18[48]  | 25[62]  |
| CTATTAGCCTGAAAAGATTCACCAGTCATGACGCTACC<br>GACCGAAAAAG | 21[154] | 18[161] |
| AGAGCCAAATCTACGTTAATACAGGACGGTGAATTCTGACGA            | 0[62]   | 4[63]   |
| GGGAGTTAAAGGCAGTATCATCGCCTCACAGCGGAA<br>ATTGGGCTCTGTA | 11[35]  | 4[28]   |

Supplementary Table 5: List of DNA 'core' sequences (continued).

| DNA Sequence                                          | Start   | End     |
|-------------------------------------------------------|---------|---------|
| GTTATTACATAAATACATAGCATCATTTCTCCGAAGGC<br>CCACCCTGATT | 16[83]  | 26[63]  |
| CTTAAGTGTCCTTACTGCGCGCTACAGGTAACGTG                   | 14[265] | 25[258] |
| TTTGCGGAGATGGTGCCCTCATAGTTAGCCAGTACGC<br>AAGCCCAATAGG | 12[41]  | 0[21]   |
| GTGTGATTCGCCATTGCGCGAACTGATAACAGAGATAGAACC            | 19[168] | 22[168] |
| AATGCCCTACATGGGAATGGAGAGCCGC                          | 1[252]  | 4[252]  |
| AGCACTAGGTGGGCTATCAAATAAATTAAGCAATGTAAGCA             | 27[119] | 14[133] |
| CAGAGGGTAATTACAATAAACTGTACAGAGAGAATAACATAA            | 8[181]  | 7[181]  |
| CATTTGAATAAATCCCAACGTGGGCGATCTCTGACTAGAATC            | 17[49]  | 15[62]  |
| AATAATACAATAGATAAGTCCAACATGTTTCTGTGTC                 | 6[153]  | 9[160]  |
| GCTGAATACCGTACGAGATTTAGGAATAAAAGGAAGGGCACT            | 13[119] | 3[132]  |
| TATCAAATGTTTGGCGAATTATTCATTTCCAAACAATAACGG            | 23[77]  | 20[77]  |
| GGGAGAGTAAGAAACGATTTTTATTATCAAGAAACCTTTTT             | 7[203]  | 11[202] |
| ATTAAATTTTTGTTTGAGAAGGATCTACCCGGAGAGG<br>GTAGCATTCAA  | 23[196] | 17[202] |
| GTAGCAACCACCCTCATTTTTACAGAGGACCCGCT                   | 1[49]   | 12[42]  |
| TGAAACCCGGCATTCCGGAACCAGAGCCGAGCCACTC<br>ACCGTGCGACAT | 8[251]  | 11[244] |
| AACGCCACCACATTGGAATAGGTGTATC                          | 2[139]  | 0[126]  |
| TAGAGCCTCAACAGAATCAATATCTGGTGCCAGCACGCCTGC            | 24[111] | 20[98]  |
| AGAAAAGGCTGGCTGACCTTCTACAGACCAGGCGCCAAAAG             | 6[104]  | 8[91]   |
| ATCATTCTTTTATTAAGTTTCATTCCATCCAACGCTCAACAG            | 4[160]  | 11[160] |
| GCTTGCCACCTTATGTAAAATTCATGAG                          | 4[76]   | 13[76]  |
| TAATAGTTTTACCACCTTTTGATAAGATCACTCATCTT<br>TGCGGAAGCAA | 4[97]   | 11[104] |
| CAGACGAAACGCCAATCAATAATCGGAGAATAGCAG<br>CCTTAACAAGAAA | 9[161]  | 6[154]  |
| ATCAGTTATTACCTTGTGAGTGAATAACCTTGCTTCGAATTT            | 26[62]  | 17[48]  |
| TAGAATTCATTACCCAAATCATGACAAGAAAGAGG                   | 5[49]   | 7[69]   |

Supplementary Table 6: List of DNA 'core' sequences (continued).

| DNA Sequence                                          | Start   | End     |
|-------------------------------------------------------|---------|---------|
| CAGATATGGGTTGATATAAGTTTTTAAATATGCAA                   | 1[154]  | 13[160] |
| ACTCACAACGCGCGGGAGATGAATATACTTTGAATACAGCTA            | 20[48]  | 20[49]  |
| CAAAGGAGCCTTTTGAATTTCAATGACAAGATAAATT<br>GTGTGCTTGCT  | 7[21]   | 8[42]   |
| TCAACCGGTTTATTAAAGCCACTTTTGATGATACAC<br>CGTATAGTATTAA | 11[245] | 0[238]  |
| CATCGAGTTGATTCTGTAGCTCAACATGATAGCCCCAA<br>CTAATGCAAAT | 3[133]  | 1[153]  |
| TTTTATCCAAAGTTGCATGATTAAGACTAGGATTAG<br>AACCTCCCGGGGT | 3[196]  | 1[216]  |
| AGAAAAGATTTTGTAAAATTTCTGGCCAGCCGGTTGATAATC            | 21[196] | 21[195] |
| AAAGTAATCAGCTAATGCAGAACGCGCCTACCGACAAAAGGT            | 9[147]  | 9[146]  |
| AAAAGAAAAATCGGGAGTTGCTGCCCTTGAGGCGGTT<br>TGCGTTCGGC   | 26[48]  | 21[39]  |
| AGCTGATAGCAAGCCTGGGGTCACAATTCACACAACAT                | 23[35]  | 18[24]  |
| ACTCCAATCAAAGCCAAATATAAAGCGGATTGCATA<br>TACGAGAATGACC | 11[105] | 7[111]  |
| ATAAATCCAGAAGCCGCGTTTTAGAGAATATAAAGCTGACTA            | 7[112]  | 8[126]  |
| GCTTTCCGGGGACGCGTAACCGATTGACCGTAATG                   | 18[258] | 21[265] |
| ACAGATGGACGGTCTGTTACTTAGCCGGTATACCAAAGCTG             | 7[70]   | 5[83]   |
| AAGAAAAGTAAGTTAACAATAATAAGAGCCCAATCCAACGCT            | 11[203] | 4[203]  |
| CAGACTGGAACCGCCTCCCTCAGAGCAATTTGCCTTTAGCGT            | 7[224]  | 7[223]  |
| AGAGCCGAAAATCATTCGGTCATAGCCC                          | 5[252]  | 7[265]  |
| TTACCATTGAATTACACCCTCCGCCAGCATTGACA                   | 9[245]  | 4[238]  |
| AAACCAAGTACCCTGTCATAAATATTAA                          | 4[139]  | 5[139]  |
| ATAATCCATTATCAAGATAACTATATGTAAGATGA                   | 25[77]  | 18[84]  |
| GCTGCATTAATGAAATTGGGCGGGCAAC                          | 21[21]  | 23[34]  |
| TCGGAACGAACCCTCACGCTGAGCCCACGCATA                     | 13[19]  | 10[18]  |
| TACCAGTAAACGAAGAACCGCCACCCTC                          | 2[76]   | 0[63]   |
| TAAAGCATGAGGCGGTCAGTATATATTTAATAGAT                   | 21[119] | 24[112] |

Supplementary Table 7: List of DNA 'core' sequences (continued).

| DNA Sequence                                          | Start   | End     |
|-------------------------------------------------------|---------|---------|
| GTGAAATAGATAGGCACTATTAAAGAACAATGAGTCGCTATT            | 17[28]  | 15[41]  |
| ATTGTCACCAGGGTTTTCCCATGTAAAACCAGG                     | 14[244] | 37[249] |
| GTGAGCGAACGGCGGTGCATCTGGCAAACAAGAGATCTCCGT            | 22[251] | 21[237] |
| GTAATCTACGTAACAGCGCGAAGAATACACTAAAATAAACGG            | 6[76]   | 12[77]  |
| CTTGAAACAATATATTTTTTAAAGAAAACAAATCGC                  | 15[63]  | 19[69]  |
| CCCAATAGCAAGCAAAGCCGTCAAGAACGCATGTAGAA<br>ACCAACATGTA | 2[160]  | 10[154] |
| CATTAATTGCGTTGCGGTAAAGCGGTCCACGCTGGTT                 | 21[40]  | 24[21]  |
| AATAAATTAAAGCTGACAGTGCGGCCCTCCCCGATATTTATT            | 16[160] | 26[147] |
| AGATTGTATAAGATATCGATGAACGGTAATCAGGTGTACGCC            | 21[217] | 24[217] |
| CGTGGCGGCTCGCCTTATGACCCTGTAATGCCTGA                   | 27[182] | 16[189] |
| CAGGAAAGTAGAAGACGTGTAGGTAAAGTAAATAA                   | 25[182] | 18[189] |
| GTAGCAAAGTCAAAAAAATTTTTAGAACCCCTCATAGAAAGGC           | 26[230] | 17[216] |
| GACTCTAGGAAAGCACTATCGGCCAGCCTACATTTACGACC             | 14[174] | 23[174] |
| TTGACGGTGATACCAAATCGGTTGTACCTAGCATTGT<br>GGCATATTA    | 27[161] | 18[168] |
| TCTAGCTGGCGAGGAGAAGCGACGGC                            | 36[249] | 38[238] |
| TAAATGAATTTTTGGATCGTCGGGTAGC                          | 3[21]   | 13[34]  |
| GTAATTAATAGTAGAAAAACACTGGAGT                          | 16[188] | 14[175] |
| CGAGCTTTCTCAAAGGGGGGATTCGCTATTACG                     | 37[226] | 15[244] |
| CAGTGCCGGTAACGACCTTATCTGGCAATGCCGTT                   | 38[237] | 26[231] |

Supplementary Table 8: List of DNA sequences carrying poly-A-overhangs for the attachment of AuNRs (for CD spectroscopy) or fluorescent dyes (for confocal fluorescence imaging).

| DNA Sequence                                                             | Start   | End     |
|--------------------------------------------------------------------------|---------|---------|
| CGGATGGACCGCCAAGGTAGAAAGATTCAAGAGCAACACTAT<br>AAAAAAAAAAAAAAAAA          | 13[98]  | 2[98]   |
| AACAGTGCAATTACGATAATATTTAGAA AAAAAAAAAA                                  | 20[97]  | 25[97]  |
| CTAATATCAGAGAGATAGCAAATAAACACAGAGCC<br>AAAAAAAAAAAAAAAAA                 | 9[175]  | 4[182]  |
| AAGACAAAGAACGCGAGAAGAGCAAAAGAAATGCTCCAGA<br>AGCAAGTTT AAAAAAAAAAAAAAAAAA | 18[118] | 27[97]  |
| TAGGGCTTGTCTGGTTCATCGTAGGATGCCCTGTCTTTCCTT<br>AAAAAAAAAAAAAAAAA          | 11[161] | 4[161]  |
| GTATTAGGAAACCAGATGCAAATCCAATCGCAATGTTTTGCGG<br>CCGTAA AAAAAAAAAAAAAAAAAA | 25[98]  | 27[118] |
| GAAGTTTACCCTCACTAACGGAACAACACTACTGGCTCATT<br>AAAAAAAAAAAAAAAAA           | 13[77]  | 2[77]   |
| CTAAAGTGTCGAGAAGAAGGCTTATCCGGTATCATTACCGCG<br>AAAAAAAAAAAAAAAAA          | 13[161] | 2[161]  |
| TGAAACAAACATCATGGAAACTCATATTTACGTGA<br>AAAAAAAAAAAAAAAAA                 | 18[83]  | 27[76]  |
| AGCCCGAAAGACTTGAACCAGACTGGATGAGGGGG<br>AAAAAAAAAAAAAAAAA                 | 9[91]   | 4[98]   |
| CCTGTTTCGCGAGCTGGTAATTTAGAGC AAAAAAAAAAAAAAAAAA                          | 18[160] | 27[160] |
| TTATAGTAAAATCCTCAAATGCTTTAAAATACTGCGGAA<br>TCTTTGCAA AAAAAAAAAAAAAAAAAA  | 8[125]  | 4[119]  |
| ATTCGCCGCAGAGGATTATACCATCAAT AAAAAAAAAAAAAAAAAA                          | 20[76]  | 25[76]  |
| GCGATTTTAAGACGAATCAGTGAATAAG AAAAAAAAAAAAAAAAAA                          | 3[77]   | 4[77]   |
| TCATATGTACCCCTAAAACAAAATAAGAAATACCATTGCAA<br>AAAAAAAAAAAAAAAAA           | 20[195] | 25[181] |
| TAATTTGCTATTTTGCACCCATTAAATC AAAAAAAAAAAAAAAAAA                          | 4[181]  | 2[182]  |
| TAGCACAACCTGTTTAGCTATAAAGTTTACCCTAA<br>AAAAAAAAAAAAAAAAA                 | 16[132] | 27[139] |
| CTTCTGATCTTTAATAAAAATACCGAACTTGAAATCAATCGT<br>AGAACAA AAAAAAAAAAAAAAAAAA | 22[167] | 25[160] |

Supplementary Table 9: List of DNA sequences carrying poly-A-overhangs (continued).

| DNA Sequence                                                   | Start   | End     |
|----------------------------------------------------------------|---------|---------|
| ACACCGGAATCATAACAATTCTAACTCAACGGCGAA<br>AAAAAAAAAAAAAAAA       | 18[188] | 27[181] |
| ATTTTCGAGACCAGTATAAAGATAACAGAACAAGCGATACAT<br>AAAAAAAAAAAAAAAA | 10[139] | 2[140]  |
| ATTTAGGCAGAGGCTTTACGAGGGTATT AAAAAA<br>AAAAAAAA                | 10[153] | 4[140]  |
| TAGGGGCTCGAGGTGAACAAAACCTTTACAAACAAT<br>AAAAAAAAAAAAAAAA       | 14[111] | 25[118] |
| ATAATGCCCAATTCTGCGAATAGCGAGATTACGAG<br>AAAAAAAAAAAAAAAA        | 13[126] | 2[119]  |

Supplementary Table 10: List of DNA sequences for pH switching.

| DNA Sequence                                                        | Role         | Start   | End     |
|---------------------------------------------------------------------|--------------|---------|---------|
| GACTAAAGACTTTTACGTAATAGGCAAA<br>AACAAAGTGCTCCAAATCATA-TTTT-Duplex1  | RH pH switch | 13[56]  | 8[63]   |
| Duplex2-TTTT-AGGGAACCGAACCACG<br>AAATCCGCGACCTACAACG                | RH pH switch | 8[62]   | 10[56]  |
| CTGATAAATTAATGAAAGGCT<br>ATCGTAAAACAGGA-TTTT-ssDNA                  | RH pH switch | 18[223] | 21[216] |
| CATCACTAAGGGAAGAAAGCG<br>CCCCGCTGCGGGAG-TTTT-Duplex1                | LH pH switch | 26[202] | 15[209] |
| Duplex2-TTTT-AAGCCTTTATTTTCATCCC<br>GCCAAAATAAAAAGGAGTTGATTAAAGAGTC | LH pH switch | 15[210] | 25[216] |
| CAAATTAAGTGAACACAAGAATTGAGTT<br>AAGCCTTACAGAAT-TTTT-ssDNA           | LH pH switch | 8[209]  | 8[210]  |

Supplementary Table 11: List of DNA sequences carrying overhangs for complementary base pairing with cholesterol-tagged DNA. The start and end positions indicate which of the original staples have to be replaced in the LH structure for the plasmonic enantiomer separation experiment.

| DNA Sequence                                                                | Start  | End    |
|-----------------------------------------------------------------------------|--------|--------|
| TCCTTCTATGCATCA – TTTT – GCGTTCGGCCATTAATTGC<br>GTTGCGGTAAAGCGGTCCACGCTGGTT | 21[40] | 24[21] |
| TCCTTCTATGCATCA – TTTT – GGTTTAAACGTCGACACCGCC<br>TGGAAGGGTTAGAAGATTTTC     | 22[62] | 22[63] |
| TTTCCCTCTCCTGGTTGGTGTGTGGACT                                                | 15[42] | 27[48] |
| AAAAGAAAAATCGGGAGTTGCTGCCCTTGAGGCGG                                         | 26[48] | 21[39] |
| TCCTTCTATGCATCA – TTTT – AAGAACAATGAGTCGCTATT<br>AATTAAT                    | 17[28] | 15[41] |
| TCCTTCTATGCATCA – TTTT – GTTCCGTAGCCCGTGTTATC<br>CTGTAAATCTCCCCGGGT         | 25[25] | 16[24] |
| TCCTTCTATGCATCA – TTTT – GCTGATAGCAAGCCTGGGGT<br>CACAATTCACACAACAT          | 23[35] | 18[24] |

Supplementary Table 12: DNA sequences carrying chemical modifications (HPLC-purified) and their function.

| DNA Sequence              | Function                                      |
|---------------------------|-----------------------------------------------|
| Thiol-TTTTTTTTTTTTTTTTT   | Functionalization of the AuNRs                |
| Atto550-TTTTTTTTTTTTTTTTT | Fluorescence modification of the LH structure |
| Atto647-TTTTTTTTTTTTTTTTT | Fluorescence modification of the RH structure |
| TGATGCATAGAAGGAA-CholTEG  | DNA handle for enantiomer separation          |

## References

- (1) Kuzyk, A.; Urban, M. J.; Idili, A.; Ricci, F.; Liu, N. *Science Advances* **2017**, *3*, e1602803.
- (2) Douglas, S. M.; Marblestone, A. H.; Teerapittayanon, S.; Vazquez, A.; Church, G. M.; Shih, W. M. *Nucleic Acids Research* **2009**, *37*, 5001–5006.
